# Supplementary material
Source: Research Square preprint supplement (doi:10.21203/rs.3.rs-10132904/v1)
Supplement: Supplementary file 1 [file 61886c7de308d97cbc3d7030.docx]

APPENDIX 1. Items of the brief Spanish version of the DFlex and their corresponding counterparts in the Original version.

| Spanish brief DFlex | Original DFlex |
| --- | --- |
| (5) 1. Cuando otros sugieren una nueva forma de hacer las cosas, me enfado o me inquieto. | 5. When others suggest a new way of doing things, I get upset or unsettled. |
| (6) 2. Me resulta difícil recordar el argumento de películas, obras de teatro o libros, pero puedo recordar escenas concretas con gran detalle. | 6. I find it difficult to remember the story line in films, plays or books, but can remember specific scenes in great detail. |
| (7) 3. Cuando entro en un estado emocional de ira o tristeza, me resulta muy difícil calmarme. | 7. Once I get into an emotional state, eg anger or sadness, it is very difficult to soothe myself. |
| (14) 4. Puedo perderme en los detalles y olvidar el verdadero objetivo de una tarea. | 14. I can get lost in details and forget the real purpose of a task. |
| (15) 5. Se me puede llamar testaruda o de “mente única”, ya que me resulta difícil cambiar de un punto de vista a otro. | 15. I can be called stubborn or single-minded as it is difficult to shift from one point of view to another. |
| (16) 6. Me resulta difícil hacer varias cosas a la vez (multitarea). | 16. I find it difficult to do several things at once (multitasking). |
| (18) 7. Me cuesta ver diferentes perspectivas de una situación. | 18. I find it hard to see different perspectives of a situation. |
| (19) 8. Me angustio mucho si los planes cambian en el último momento. | 19. I get very distressed if plans get changed at the last minute. |
| (20) 9. Puedo sentirme abrumada por demasiados detalles. | 20. I can get overwhelmed by too many details. |
| (21) 10. Me disgustan los cambios. | 21. I dislike change. |
